# Supplementary material
Source: MDPI journal article supplement (https://www.mdpi.com/2073-4344/12/12/1541)
Supplement: s1 [file s1 › catalysts-2060901-supplementary.pdf]

## Supplementary Information

# Hydrogen Evolution Volcano(es) – From Acidic to Neutral and Alkaline Solutions

**Goitom K. Gebremariam <sup>1,2†</sup>, Aleksandar Z. Jovanović <sup>1†</sup>, Ana S. Dobrota <sup>1</sup>, Natalia V. Skorodumova <sup>3</sup> and Igor A. Pašti <sup>1,\*</sup>**

<sup>1</sup> University of Belgrade – Faculty of Physical Chemistry, Studentski trg 12-16, 11158 Belgrade, Serbia

<sup>2</sup> Department of Chemistry, Mai Nefhi College of Science, National Higher Education and Research Institute, Asmara 12676, Eritrea

<sup>3</sup> Department of Materials Science and Engineering, School of Industrial Engineering and Management, KTH – Royal Institute of Technology, Brinellvägen 23, 100 44 Stockholm, Sweden

\* Correspondence: igor@ffh.bg.ac.rs; +381 11 3336 625

† These authors contributed equally

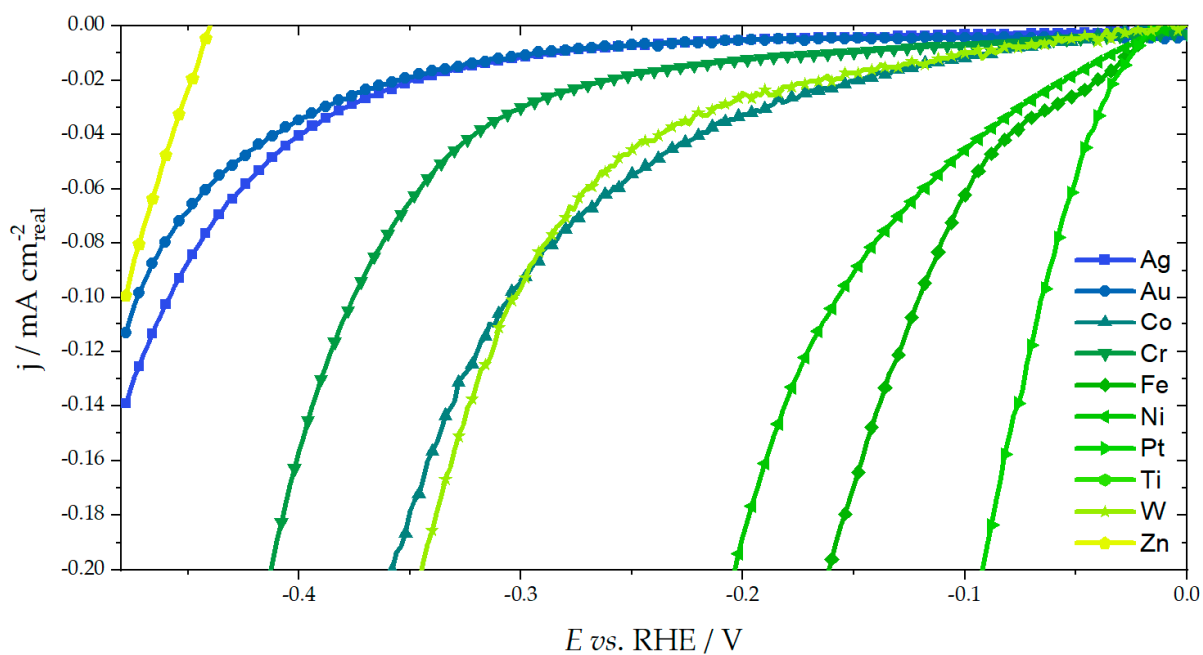

**Figure S1.** HER polarization curves in 0.1 mol dm<sup>-3</sup> KOH solution (freshly polished electrodes)

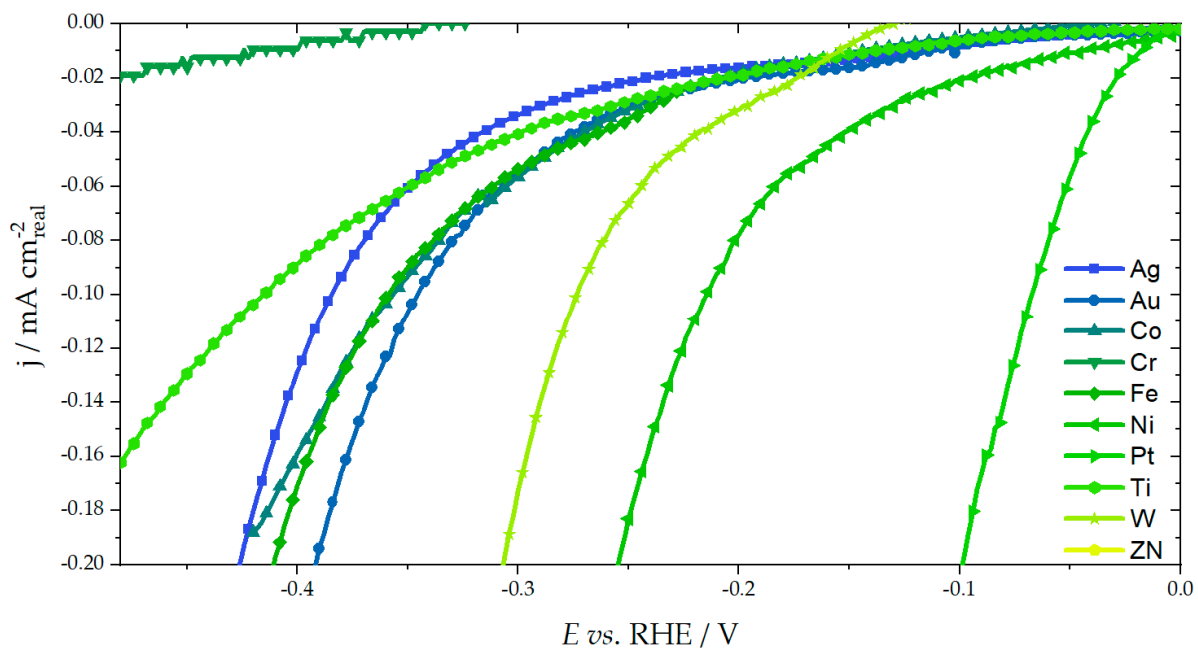

**Figure S2.** HER polarization curves in 0.1 mol dm<sup>-3</sup> HCl solution (freshly polished electrodes)
